# Supplementary material
Source: PubMed Central journal article supplement (PMC3535907)
Supplement: AAC.01384-12_zac999101466so1.pdf [file AAC.01384-12_zac999101466so1.pdf]

Table S1. Primers used in this study

| primer            | séquence                                |
|-------------------|-----------------------------------------|
| GES-A             | 5'-ATG CGC TTC ATT CAC GCA C-3'         |
| GES-B             | 5'-CTA TTT GTC CGT GCT CAG G-3'         |
| PER-A             | 5'-ATG AAT GTC ATT ATA AAA GC-3'        |
| PER-B             | 5'-AAT TTG GGC TTA GGG CAG AA-3'        |
| VEB-A             | 5'-CGA CTT CCA TTT CCC GAT GC-3'        |
| VEB-B             | 5'-GGA CTC TGC AAC AAA TAC GC-3'        |
| VIM2004A          | 5'-GTT TGG TCG CAT ATC GCA AC-3'        |
| VIM2004B          | 5'-AAT GCG CAG CAC CAG GAT AG-3'        |
| IMP2004A          | 5'-ACA YGG YTT GGT DGT TCT TG-3'        |
| IMP2004B          | 5'-GGT TTA AYA AAA CAA CCA CC-3'        |
| NDM-1A            | 5'-GGT TTG GCG ATC TGG TTT TC-3'        |
| NDM-1B            | 5'-CGG AAT GGC TCA TCA CGA TC-3'        |
| SIM-1A            | 5'-TAC AAG GGA TTC GGC ATC G-3'         |
| SIM-1B            | 5'-TAA TGG CCT GTT CCC ATG TG-3'        |
| OXA-23A           | 5'-GAT GTG TCA TAG TAT TCG TCG-3'       |
| OXA-23B           | 5'-TCA CAA CAA CTA AAA GCA CTG-3'       |
| OXA-40A           | 5'-GTA CTA ATC AAA GTT GTG AA-3'        |
| OXA-40B           | 5'-TTC CCC TAA CAT GAA TTT GT-3'        |
| OXA-51A           | 5'-CTA ATA ATT GAT CTA CTC AAG-3'       |
| OXA-51B           | 5'-CCA GTG GAT GGA TGG ATA GAT TAT C-3' |
| OXA-58A           | 5'-CGA TCA GAA TGT TCA AGC GC-3'        |
| OXA-58B           | 5'-ACG ATT CTC CCC TCT GCG C-3'         |
| OXA-143A          | 5'-AGT TAA CTT TCA ATA ATT G-3'         |
| OXA-143B          | 5'-TTG GAA AAT TAT ATA ATC CC-3'        |
| IS <i>Abal</i> -B | 5'-CAT GTA AAC CAA TGC TCA CC-3'        |
